# Supplementary material for: Protease-activated receptor-1 (PAR-1): a promising molecular target for cancer
Source: PubMed Central journal article supplement (PMC5739818; doi:10.18632/oncotarget.21015), 2017-09-18
Supplement: oncotarget-08-107334-s001.pdf [file oncotarget-08-107334-s001.pdf]

## **Protease-activated receptor-1 (PAR-1): a promising molecular target for cancer**

### **SUPPLEMENTARY MATERIALS**

**Supplementary Table 1: PAR-1 in cancer.** See [Supplementary Table\\_1](#)
